# Supplementary material for: Evidence of Validity and Normative Values of a New Auditory Backward Masking Test
Source: MDPI journal article supplement (doi:10.3390/jcm11174933), 2022-08-23
Supplement: s1 [file s1]

## Annex S1: Backward Masking Test answer sheet.

## AUDITORY TEMPORAL MASKING TEST (FILIPPINI, R)

## PRACTICE LIST

| FIRST | SECOND |
|-------|--------|
| 1     | 400    |
| 2     | 400    |
| 3     | --     |
| 4     | 400    |
| 5     | 400    |
| 6     | --     |
| 7     | 400    |
| 8     | 400    |
| 9     | --     |
| 10    | 400    |
| 11    | 400    |
| 12    | --     |
| 13    | 400    |
| 14    | 400    |
| 15    | --     |

## LIST 1

| EAR: |     |
|------|-----|
| 1    | 400 |
| 2    | 100 |
| 3    | 30  |
| 4    | 50  |
| 5    | --  |
| 6    | 0   |
| 7    | 20  |
| 8    | --  |
| 9    | 200 |
| 10   | 10  |
| 11   | --  |
| 12   | 30  |
| 13   | 50  |
| 14   | 0   |
| 15   | --  |
| 16   | 20  |
| 17   | 100 |
| 18   | 400 |
| 19   | 0   |
| 20   | 10  |
| 21   | 100 |
| 22   | 200 |
| 23   | 10  |
| 24   | --  |
| 25   | 400 |
| 26   | 20  |
| 27   | 50  |
| 28   | --  |
| 29   | 30  |
| 30   | 200 |

## LIST 2

| EAR: |     |
|------|-----|
| 1    | 400 |
| 2    | 100 |
| 3    | 200 |
| 4    | --  |
| 5    | 30  |
| 6    | 50  |
| 7    | 10  |
| 8    | 100 |
| 9    | 20  |
| 10   | --  |
| 11   | 0   |
| 12   | 400 |
| 13   | --  |
| 14   | 30  |
| 15   | 10  |
| 16   | 200 |
| 17   | 10  |
| 18   | 0   |
| 19   | --  |
| 20   | 30  |
| 21   | 200 |
| 22   | 50  |
| 23   | --  |
| 24   | 50  |
| 25   | 400 |
| 26   | 20  |
| 27   | 0   |
| 28   | 20  |
| 29   | 100 |
| 30   | --  |

NAME/ID

DATE OF BIRTH

DATE OF ASSESSMENT

OBS.:

## RESULTS

LIST 1

400 - ...../6

TONE THRESHOLD: ...../6

TONE INTENSITY: ...../6

MASK INTENSITY: ...../6

30 - ...../6

20 - ...../6

10 - ...../6

0 - ...../6

INTERVAL THRESHOLD

LIST 2

400 - ...../6

TONE THRESHOLD: ...../6

TONE INTENSITY: ...../6

MASK INTENSITY: ...../6

30 - ...../6

20 - ...../6

10 - ...../6

0 - ...../6

INTERVAL THRESHOLD
